# Supplementary material for: Modified Bridgman growth and characterization of a novel mid-infrared transparent optical crystal: LiGa3Te5
Source: Royal Society of Chemistry journal article supplement (doi:10.1039/c4ra02740j), 2014-01-01
Supplement: c4ra02740j1.pdf [file c4ra02740j1.pdf]

## Electronic Supplementary Information (ESI) available:

### Modified Bridgman Growth and Characterization of a Novel Mid-infrared Nonlinear Optical Crystal: LiGa<sub>3</sub>Te<sub>5</sub>

Shanpeng Wang<sup>†</sup>, Guandong Liu<sup>†</sup>, Qiong Shi<sup>†</sup>, Zeliang Gao<sup>†</sup>, Qingming Lu<sup>‡</sup>, and Xutang Tao<sup>\*,†</sup>

<sup>†</sup> State Key Laboratory of Crystal Materials, Shandong University, Jinan, 250100, China

<sup>‡</sup> School of Chemistry and Engineering, Shandong University, Jinan, 250100, China

\*E-mail: [txt@sdu.edu.cn](mailto:txt@sdu.edu.cn)

Fig. S1 Photograph of compact polycrystalline LGT.

Fig. S2 XRD pattern of polycrystalline LGT (up in blue) comparing with the calculated one (below in red).

Fig. S3 Specific heat of LGT crystal.

Table S1 Atomic Positions ( $\times 10^4$ ) and Isotropic Displacement Factors ( $\text{\AA}^2 \times 10^3$ ) for LGT

Table S2 Selected bond lengths ( $\text{\AA}$ ) and angles (deg.) for LGT.

Fig. S1 Photograph of compact polycrystalline LGT.

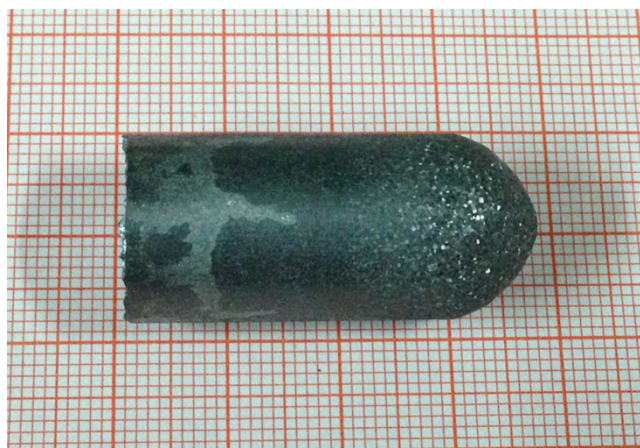

Fig. S2 XRD pattern of polycrystalline LGT (up in blue) comparing with the calculated one (below in red).

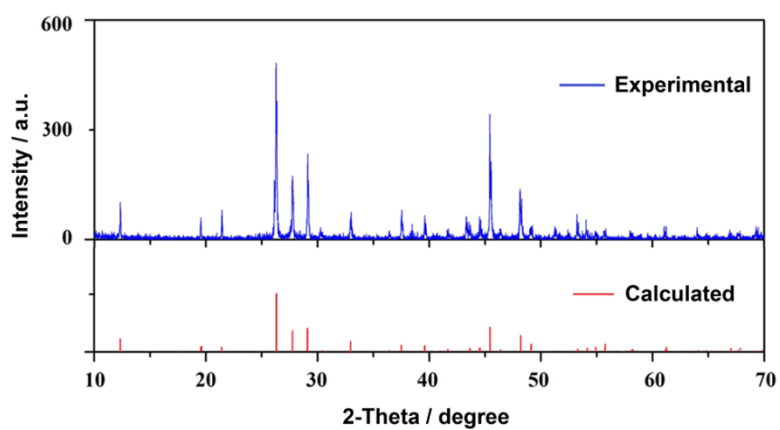

Fig. S3 Specific heat of LGT crystal.

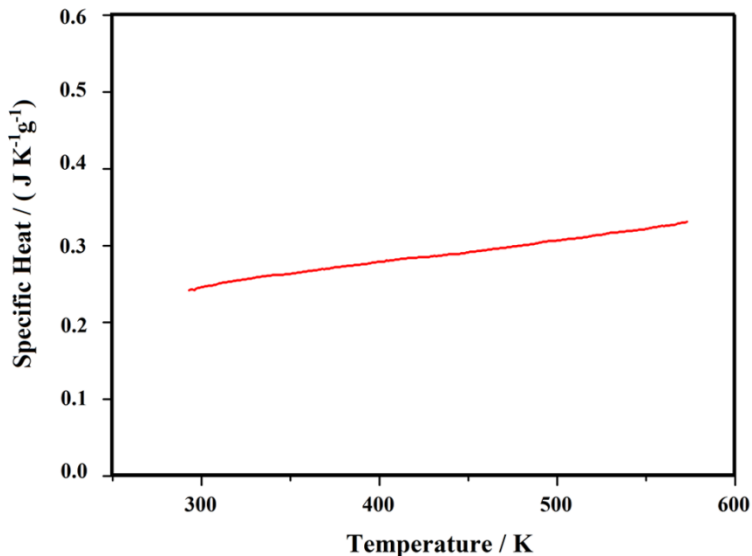

Table S1 Atomic Positions ( $\times 10^4$ ) and Isotropic Displacement Factors ( $\text{\AA}^2 \times 10^3$ ) for LGT

|       | x       | y        | z       | $U(\text{eq})$ |
|-------|---------|----------|---------|----------------|
| Te(5) | 3893(1) | 8590(1)  | 2875(1) | 21(1)          |
| Te(4) | 6324(1) | 8677(1)  | 4352(1) | 15(1)          |
| Te(3) | 4149(1) | 10000(1) | 5000(1) | 21(1)          |
| Te(2) | 6667(1) | 11666(1) | 3333(1) | 20(1)          |
| Te(1) | 3333(1) | 6667(1)  | 4954(1) | 14(1)          |
| Ga(1) | 5842(1) | 9981(1)  | 2477(1) | 17(1)          |
| Ga(2) | 4446(1) | 8574(1)  | 4288(1) | 17(1)          |
| Li(1) | 4080(3) | 10740(3) | 3333(1) | 34(1)          |
| Li(2) | 3333(2) | 6667(2)  | 1667(1) | 1(1)           |
| Li(3) | 3333(1) | 6667(2)  | 1025(2) | 1(2)           |

Table S2 Bond lengths ( $\text{\AA}$ ) and angles (deg.) for LGT.

|               |            |                |            |
|---------------|------------|----------------|------------|
| Te(5)-Ga(1)   | 2.5905(14) | Te(1)-Ga(2)    | 2.6536(13) |
| Te(5)-Ga(2)   | 2.6164(18) | Te(1)-Ga(2)#8  | 2.6536(13) |
| Te(5)-Li(3)#1 | 2.653(8)   | Ga(1)-Te(4)#9  | 2.6524(18) |
| Te(5)-Li(1)   | 3.07(2)    | Ga(1)-Te(4)#3  | 2.6623(15) |
| Te(5)-Li(2)   | 3.2521(13) | Li(1)-Te(5)#10 | 3.07(2)    |
| Te(4)-Ga(2)   | 2.6249(15) | Li(1)-Te(3)#11 | 3.144(6)   |

|                       |            |                         |            |
|-----------------------|------------|-------------------------|------------|
| Te(4)-Ga(1)#2         | 2.6524(18) | Li(1)-Te(2)#12          | 3.26(3)    |
| Te(4)-Ga(1)#3         | 2.6622(15) | Li(2)-Li(3)#1           | 1.13(2)    |
| Te(3)-Ga(2)#4         | 2.6091(13) | Li(2)-Te(5)#13          | 3.2520(13) |
| Te(3)-Ga(2)           | 2.6091(13) | Li(2)-Te(5)#1           | 3.2520(13) |
| Te(3)-Li(1)           | 3.144(6)   | Li(2)-Te(5)#7           | 3.2521(13) |
| Te(3)-Li(1)#5         | 3.144(6)   | Li(2)-Te(5)#8           | 3.2521(13) |
| Te(2)-Ga(1)           | 2.5803(13) | Li(2)-Te(5)#14          | 3.2521(13) |
| Te(2)-Ga(1)#3         | 2.5803(13) | Li(3)-Li(3)#1           | 2.26(4)    |
| Te(2)-Li(1)#6         | 3.26(3)    | Li(3)-Te(5)#13          | 2.653(8)   |
| Te(2)-Li(1)           | 3.26(3)    | Li(3)-Te(5)#1           | 2.653(8)   |
| Te(1)-Ga(2)#7         | 2.6536(13) | Li(3)-Te(5)#14          | 2.653(8)   |
|                       |            |                         |            |
| Ga(1)-Te(5)-Ga(2)     | 92.83(3)   | Te(5)#10-Li(1)-Te(3)    | 85.9(4)    |
| Ga(1)-Te(5)-Li(3)#1   | 110.3(2)   | Te(5)-Li(1)-Te(3)       | 84.5(4)    |
| Ga(2)-Te(5)-Li(3)#1   | 106.5(4)   | Te(5)#10-Li(1)-Te(3)#11 | 84.5(4)    |
| Ga(1)-Te(5)-Li(1)     | 77.3(6)    | Te(5)-Li(1)-Te(3)#11    | 85.9(4)    |
| Ga(2)-Te(5)-Li(1)     | 83.40(6)   | Te(3)-Li(1)-Te(3)#11    | 162.3(13)  |
| Li(3)#1-Te(5)-Li(1)   | 166.7(5)   | Te(5)#10-Li(1)-Te(2)#12 | 85.16(17)  |
| Ga(1)-Te(5)-Li(2)     | 100.91(3)  | Te(5)-Li(1)-Te(2)#12    | 158.0(8)   |
| Ga(2)-Te(5)-Li(2)     | 124.24(4)  | Te(3)-Li(1)-Te(2)#12    | 108.9(6)   |
| Li(3)#1-Te(5)-Li(2)   | 18.8(4)    | Te(3)#11-Li(1)-Te(2)#12 | 85.0(4)    |
| Li(1)-Te(5)-Li(2)     | 152.29(10) | Te(5)#10-Li(1)-Te(2)    | 158.0(8)   |
| Ga(2)-Te(4)-Ga(1)#2   | 96.24(3)   | Te(5)-Li(1)-Te(2)       | 85.16(17)  |
| Ga(2)-Te(4)-Ga(1)#3   | 95.71(3)   | Te(3)-Li(1)-Te(2)       | 85.0(4)    |
| Ga(1)#2-Te(4)-Ga(1)#3 | 81.96(3)   | Te(3)#11-Li(1)-Te(2)    | 108.9(6)   |
| Ga(2)#4-Te(3)-Ga(2)   | 112.56(4)  | Te(2)#12-Li(1)-Te(2)    | 78.9(8)    |
| Ga(2)#4-Te(3)-Li(1)   | 111.2(7)   | Li(3)#1-Li(2)-Te(5)#13  | 130.90(2)  |
| Ga(2)-Te(3)-Li(1)     | 82.1(2)    | Li(3)#1-Li(2)-Te(5)#1   | 130.90(2)  |

---

|                       |           |                         |             |
|-----------------------|-----------|-------------------------|-------------|
| Ga(2)#4-Te(3)-Li(1)#5 | 82.1(2)   | Te(5)#13-Li(2)-Te(5)#1  | 81.78(4)    |
| Ga(2)-Te(3)-Li(1)#5   | 111.2(7)  | Li(3)#1-Li(2)-Te(5)     | 49.10(2)    |
| Li(1)-Te(3)-Li(1)#5   | 156.6(7)  | Te(5)#13-Li(2)-Te(5)    | 113.59(3)   |
| Ga(1)-Te(2)-Ga(1)#3   | 89.94(5)  | Te(5)#1-Li(2)-Te(5)     | 159.571(17) |
| Ga(1)-Te(2)-Li(1)#6   | 120.5(3)  | Li(3)#1-Li(2)-Te(5)#7   | 49.10(2)    |
| Ga(1)#3-Te(2)-Li(1)#6 | 74.0(3)   | Te(5)#13-Li(2)-Te(5)#7  | 159.573(17) |
| Ga(1)-Te(2)-Li(1)     | 74.0(3)   | Te(5)#1-Li(2)-Te(5)#7   | 87.07(4)    |
| Ga(1)#3-Te(2)-Li(1)   | 120.5(3)  | Te(5)-Li(2)-Te(5)#7     | 81.78(4)    |
| Li(1)#6-Te(2)-Li(1)   | 161.1(8)  | Li(3)#1-Li(2)-Te(5)#8   | 49.10(2)    |
| Ga(2)#7-Te(1)-Ga(2)   | 101.93(3) | Te(5)#13-Li(2)-Te(5)#8  | 87.07(4)    |
| Ga(2)#7-Te(1)-Ga(2)#8 | 101.93(3) | Te(5)#1-Li(2)-Te(5)#8   | 113.59(3)   |
| Ga(2)-Te(1)-Ga(2)#8   | 101.93(3) | Te(5)-Li(2)-Te(5)#8     | 81.78(4)    |
| Te(2)-Ga(1)-Te(5)     | 112.04(4) | Te(5)#7-Li(2)-Te(5)#8   | 81.78(4)    |
| Te(2)-Ga(1)-Te(4)#9   | 115.28(4) | Li(3)#1-Li(2)-Te(5)#14  | 130.90(2)   |
| Te(5)-Ga(1)-Te(4)#9   | 104.42(3) | Te(5)#13-Li(2)-Te(5)#14 | 81.78(4)    |
| Te(2)-Ga(1)-Te(4)#3   | 115.80(3) | Te(5)#1-Li(2)-Te(5)#14  | 81.78(4)    |
| Te(5)-Ga(1)-Te(4)#3   | 110.27(3) | Te(5)-Li(2)-Te(5)#14    | 87.07(4)    |
| Te(4)#9-Ga(1)-Te(4)#3 | 97.68(3)  | Te(5)#7-Li(2)-Te(5)#14  | 113.59(3)   |
| Te(3)-Ga(2)-Te(5)     | 106.33(4) | Te(5)#8-Li(2)-Te(5)#14  | 159.572(17) |
| Te(3)-Ga(2)-Te(4)     | 120.02(3) | Li(3)#1-Li(3)-Te(5)#13  | 112.1(4)    |
| Te(5)-Ga(2)-Te(4)     | 110.32(3) | Li(3)#1-Li(3)-Te(5)#1   | 112.1(4)    |
| Te(3)-Ga(2)-Te(1)     | 110.24(4) | Te(5)#13-Li(3)-Te(5)#1  | 106.7(5)    |
| Te(5)-Ga(2)-Te(1)     | 113.65(4) | Li(3)#1-Li(3)-Te(5)#14  | 112.1(4)    |
| Te(4)-Ga(2)-Te(1)     | 96.36(2)  | Te(5)#13-Li(3)-Te(5)#14 | 106.7(5)    |
| Te(5)#10-Li(1)-Te(5)  | 113.9(12) | Te(5)#1-Li(3)-Te(5)#14  | 106.7(5)    |

---
